£26,815 per quarter. In comparison, LOS was 3 days (IQR 2-4), which translates to the cost of bed occupancy of £12,771 and saving of £14,043 per quarter, in the second cycle.

**Conclusions:** The introduction of simple interventions in a DGH can help to significantly improve patient outcomes in those admitted with Traumatic brain injury.

### 1602 A Quality Improvement Project on The Management of Patients with Traumatic Head Injury Presenting to A District General Hospital

A. Muthusami<sup>1</sup>, S. Techaboonanake<sup>2</sup>, N. Desai<sup>2</sup>, N. Malik<sup>2</sup>, M. Reynolds<sup>2</sup>, K. Ahn<sup>2</sup>, L. De Carvalho<sup>2</sup>, M. Gawley<sup>2</sup>, N. Waraich<sup>2</sup>

<sup>1</sup>Russells Hall Hospital, Dudley, United Kingdom, <sup>2</sup>Walsall Healthcare NHS Trust, Birmingham, United Kingdom

**Introduction:** Traumatic Brain Injury (TBI) is associated with morbidity and mortality. All District General Hospitals (DGH) in West Midlands liaise with Neurosurgery centres for management of these patients through a referral system (NORSe). The aim of this study was to assess outcomes in TBI following the implementation of vital interventions.

**Method:** A retrospective data was collected between 1/1/2019 and 1/12/2020. We included all patients admitted with traumatic brain injury over the age of 16. We accessed the data from the hospital database, clinical notes, and NORSe. A re-audit was performed following implementations of recommendations (proforma and care of elderly input). Further data were collected prospectively.

**Results:** Our cohort included n1=61 patients (first cycle) and n2= 29 (second cycle). The demographic age and gender were comparable in both cycles. The median time for Neurosurgery advice was 229 minutes (IQR 60-690) in the first cycle as compared to 80minutes (IQR 40-120, P<0.05) and the main cause for delay was inadequate information transfer. The mortality rate was 24% (5 were attributed to sepsis), as compared to 14% in the second cycle. The median length of stay (LOS) was 4 days (IQR 3-13.5) in the first cycle, which translates to a cost of
